# Supplementary material
Source: HighWire-hosted journal article supplement (https://jnm.snmjournals.org/highwire/filestream/94415/field_highwire_adjunct_files/0/114777_Supplemental_Data.pdf)
Supplement: 114777_Supplemental_Data.pdf [file 114777_Supplemental_Data.pdf]

**SUPPLEMENTAL TABLE 1. Selective chemokine receptor antagonists**

| Chemokine receptor | Antagonist chemical structure                                                        |
|--------------------|--------------------------------------------------------------------------------------|
| <b>CCR1</b>        | 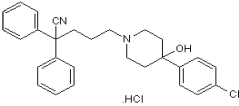   |
| <b>CCR2</b>        |    |
| <b>CCR3</b>        |    |
| <b>CCR4</b>        |    |
| <b>CCR5</b>        |   |
| <b>CCR8</b>        |  |
| <b>CXCR4</b>       |  |

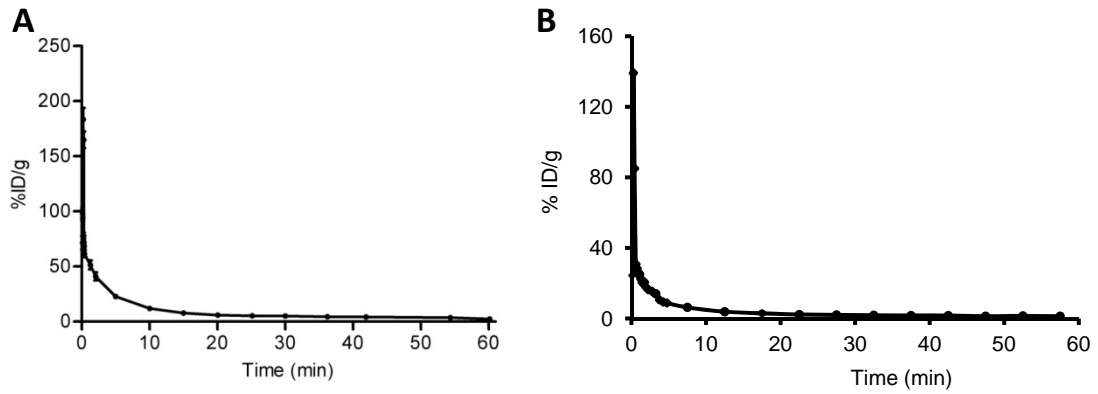

**SUPPLEMENTAL FIGURE 1.** Blood clearance of  $^{64}\text{Cu}$ -DOTA-vMIP-II in C57BL/6 mice (A) and ApoE<sup>-/-</sup> (B\*) mice showing fast renal clearance (n=4)

\*Clearance curve was obtained by drawing region of interest on the heart of mice from PET images.

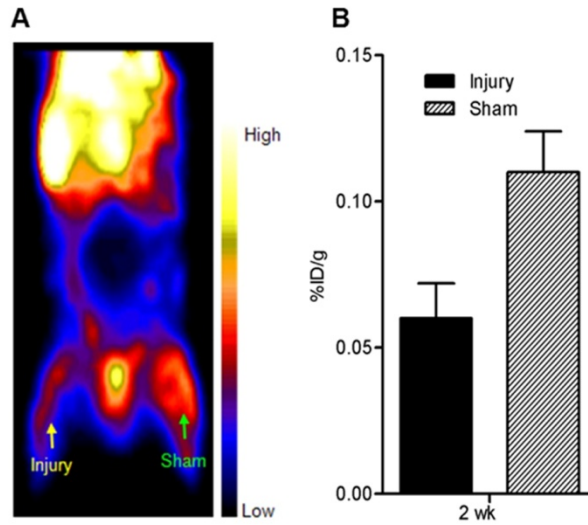

**SUPPLEMENTAL FIGURE 2.**  $[^{15}\text{O}]\text{CO}$  PET imaging (0- to 5-min dynamic scan) of wire-injured ApoE<sup>-/-</sup> mice at 2 wk after injury (A) showing less blood volume at the injury site than at the sham-operated site. Quantitative uptake analysis (B) showing greater uptake at the sham-operated site than at the injury site.

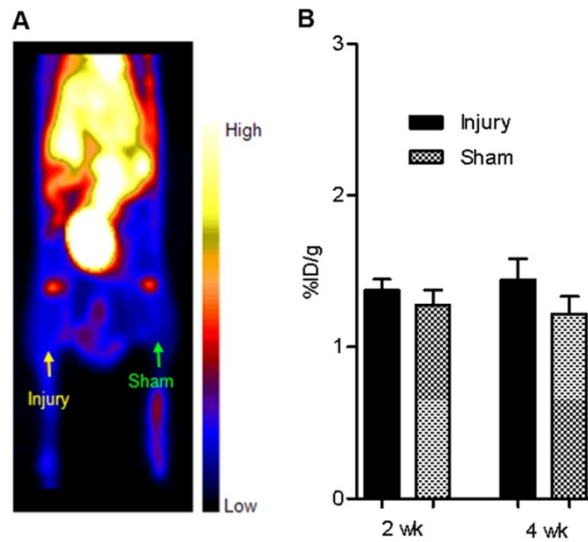

**SUPPLEMENTAL FIGURE 3.** Representative [ $^{18}\text{F}$ ]FDG PET (0- to 60-min dynamic scan) (A) showing no difference in tracer accumulation at the injury and sham sites in wire-injured, wild-type C57BL/6 mice.  $^{18}\text{F}$ -FDG uptake analysis at both injury and sham sites at 2 and 4 weeks after injury (B).

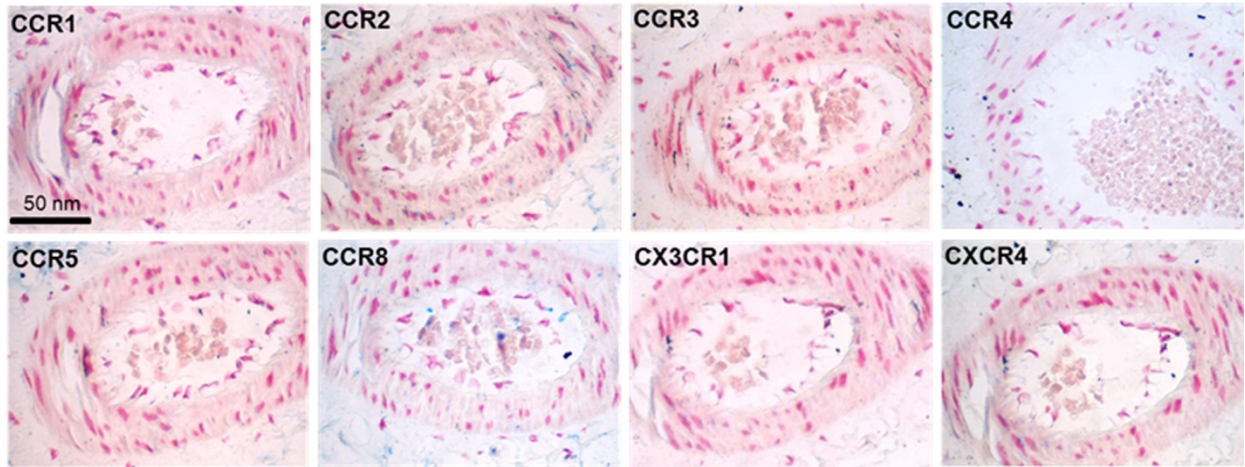

**SUPPLEMENTAL FIGURE 4.** Immunohistochemistry staining of chemokine receptors on the tissue collected from sham-operated thighs showing no expression of chemokine receptors.
